# Supplementary material for: A Strategy for Gene Knockdown in Dinoflagellates
Source: MDPI journal article supplement (doi:10.3390/microorganisms10061131), 2022-05-31
Supplement: s1 [file s1]

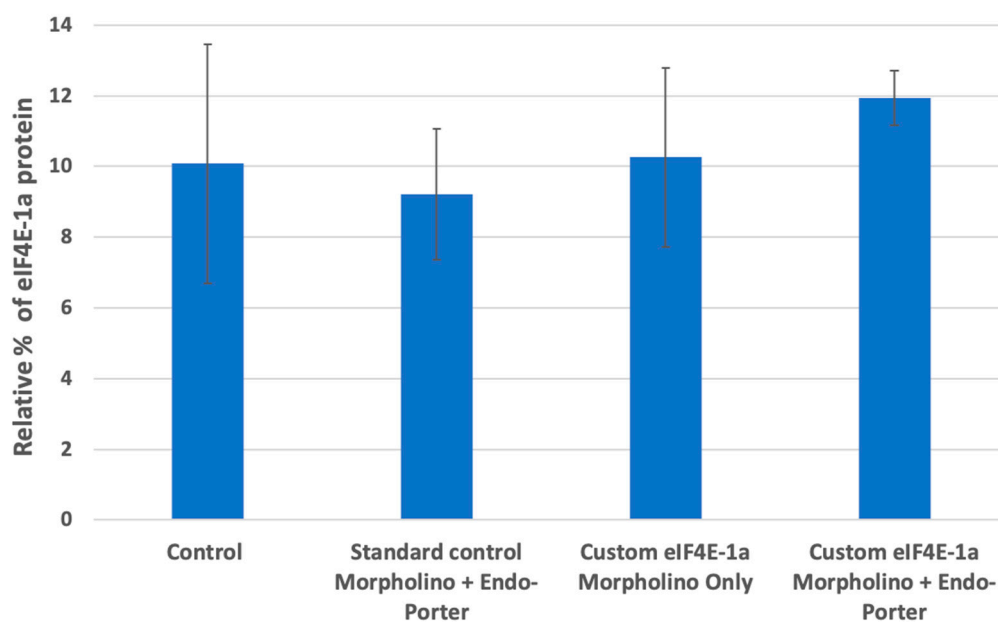

**Supplemental Figure S1.** Western blot analyses for eIF4E-1a concentrations within control and treated cells at 96 hours post-MO [10  $\mu$ M] addition (N = 3). Protein loading and relative expression levels was verified by probing with anti-eIF4E-1a mouse monoclonal and HRP-conjugated anti-mouse IgG and compared to total protein volumes. The effect of the custom translation-blocking morpholinos show no effect after 96 hours of treatment. Statistical analysis was done with t-tests using pooled standard deviations.

No significant difference between any samples found based on a  $p$ -value of < 0.05.

**Supplemental Table S1.** Lissamine uptake in *A. carterae* cells 48 hours post treatment. Intensity of the Lissamine signal is shown in relative fluorescence units (RFUs). A large positive-skew is evident in the “Antisense Morpholino + Endo Porter” culture, characterized by the extreme difference in the mean and median.

| Condition                          | Mean (RFUs) | Median (RFUs) |
|------------------------------------|-------------|---------------|
| Control                            | 3043.46     | 2143.67       |
| Endo Porter Only                   | 2572.00     | 2296.67       |
| Antisense Morpholino Only          | 3706.23     | 2209.00       |
| Antisense Morpholino + Endo Porter | 153,246.42  | 3236.17       |
